# Supplementary material for: High-quality Fe-doped TiO2 films with superior visible-light performance
Source: Royal Society of Chemistry journal article supplement (doi:10.1039/c2jm34298g), 2012-01-01
Supplement: c2jm34298g.pdf [file c2jm34298g.pdf]

# Supplement to: High-quality Fe-doped TiO<sub>2</sub> films with superior visible-light performance

Ren Su,<sup>a</sup> Ralf Bechstein,<sup>\*a</sup> Jakob Kibsgaard,<sup>a</sup>  
Ronnie T. Vang,<sup>a</sup> and Flemming Besenbacher<sup>\*a</sup>

## BET measurement

The total surface area of the films was measured by the Brunauer-  
10 Emmett-Teller (BET) method using an Autosorb-1  
(Quantachrome, US) BET setup with Kr as adsorbate. Krypton  
gas was used as adsorbate since it has a relative low vapour  
pressure which allows measuring very small total surface areas.  
Prior to the measurement the samples were degassed at 400 K for  
15 at least 8 h in vacuum. The Kr adsorption isotherm was then  
measured at 77 K. Multipoint measurements (see Fig. S1) in the  
pressure range of  $0.05 < P/P_0 < 0.25$  were used to calculate the  
specific surface area.<sup>1</sup> The vapor pressure ( $P_0$ ) of Kr at 77 K was  
set to 350 Pa for all measurements. The cross-sectional area of a  
20 Kr molecule is  $0.205 \text{ nm}^2$  and the apparent surface area of an as-  
prepared film is  $78.5 \text{ mm}^2$ .

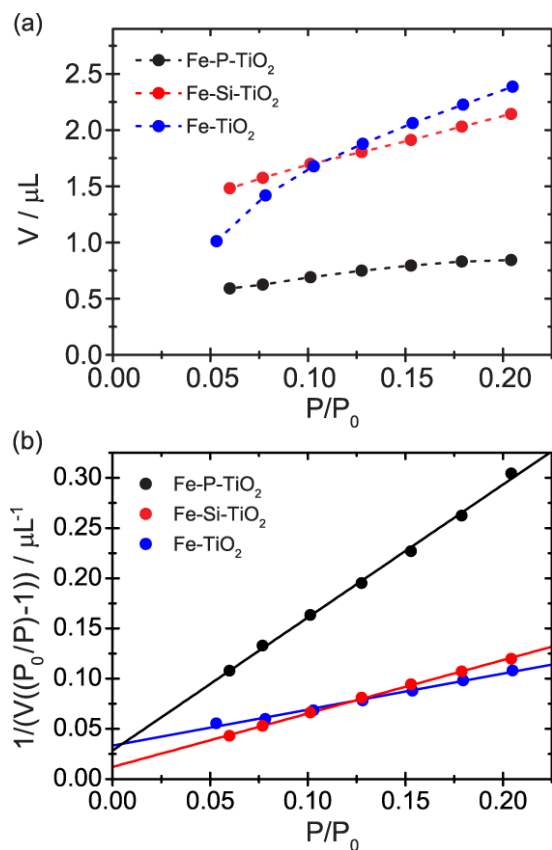

Figure S1. BET surface area measurement of the Fe-P-TiO<sub>2</sub>, Fe-Si-TiO<sub>2</sub>,  
and Fe-TiO<sub>2</sub> film: raw data (a) and linear fit in order to extract the total  
25 surface area (b). The fitting parameters are listed in Tab. S1.

Table S1 lists the values obtained for slope and intercept from the  
linear fitting to the data in Fig. S1(b) as well as the calculated  
values for the absolute and the specific surface area and the heat  
of condensation.

30

Table S1. BET surface area analysis of the Fe-P-TiO<sub>2</sub>, Fe-Si-TiO<sub>2</sub>, and  
Fe-TiO<sub>2</sub> films. Slope and intercept are obtained by linear fitting of the  
data in Fig. S1(b).

| Catalyst                                                   | Fe-P-TiO <sub>2</sub> | Fe-Si-TiO <sub>2</sub> | Fe-TiO <sub>2</sub> |
|------------------------------------------------------------|-----------------------|------------------------|---------------------|
| Slope (μL <sup>-1</sup> )                                  | 1.325±0.028           | 0.534±0.007            | 0.358±0.015         |
| Intercept (μL <sup>-1</sup> )                              | 0.028±0.004           | 0.012±0.001            | 0.033±0.002         |
| Total surface<br>area (cm <sup>2</sup> )                   | 41±1                  | 101±1                  | 140±6               |
| Specific surface<br>area (m <sup>2</sup> /m <sup>2</sup> ) | 52±1                  | 128±2                  | 179±8               |
| Heat of<br>condensation<br>(kJ/mol)                        | 2.5±0.1               | 2.4±0.1                | 1.6±0.1             |

35

## MB adsorption on Fe-TiO<sub>2</sub>

An aqueous methylene blue (MB) solution (4 μM) was used for  
the photo-decomposition test under blue light irradiation. A  
continuously analysing UV-vis spectrometer setup was utilized to  
quantify the MB concentration as function of time. Prior to  
40 irradiation the sample was placed in the solution and kept in dark  
for at least 1 h until the MB concentration stabilised. During that  
time usually a decrease in MB concentration was observed (see  
Fig. S2). We assign this decrease to MB adsorption on the sample  
45 surface and on all other surfaces of the equipment in contact with  
the solution, *i.e.*, the beaker, the tubing and the cuvette.

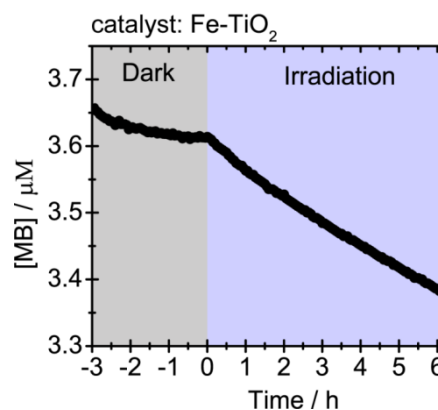

Figure S2. The concentration of MB in an aqueous solution in the dark  
and upon irradiation as a function of time.

50

## Notes and references

<sup>a</sup> Interdisciplinary Nanoscience Center (iNANO) and Department of  
Physics and Astronomy, Aarhus University, DK-8000, Aarhus, Denmark.  
Fax: +45 8715 4041 Tel: +45 8715 5863; E-mail: ralf@inano.au.dk (R.  
55 Bechstein), jbe@inano.au.dk (F. Besenbacher)

1. S. Brunauer, P. H. Emmett, E. Teller, *J. Am. Chem. Soc.*, 1938, **60**,  
309.
